# Supplementary material
Source: publisher site journal article supplement (https://www.degruyterbrill.com/publication/isbn/9783110924268/downloadAsset/9783110924268_Inhaltsverzeichnis.pdf)
Supplement: Supplementary file 1 [file 9783110924268_Inhaltsverzeichnis.pdf]

## Inhaltsverzeichnis

| Nr.                                                                                                                                                                                                       | Seite |
|-----------------------------------------------------------------------------------------------------------------------------------------------------------------------------------------------------------|-------|
| 1 Ausnahmegenehmigung für Schächten warmblütiger Tiere. BVerfG, Urteil vom 15.1.2002 (1 BvR 1783/99) .....                                                                                                | 1     |
| 2 Befreiung von einer Klassenfahrt aus religiösen Gründen. VG Aachen, Beschluss vom 16.1.2002 (9 L 1313/01) .....                                                                                         | 15    |
| 3 Befreiung von einer Klassenfahrt aus religiösen Gründen. OVG Nordrhein-Westfalen, Beschluss vom 17.1.2002 (19 B 99/02) .....                                                                            | 20    |
| 4 Zum Grundrechtsschutz für eine vor einem Iman in Deutschland geschlossene Ehe. OVG Saarland, Beschluss vom 18.1.2002 (1 W 9/01) .....                                                                   | 21    |
| 5 Gebetspausen während der Arbeitszeit. LAG Hamm, Urteil vom 18.1.2002 (5 Sa 1782/01) .....                                                                                                               | 25    |
| 6 Anerkennung als Schwangerschaftskonfliktberatungsstelle, Widerruf. Niedersächsisches OVG, Beschluss vom 21.1.2002 (11 MA 3363/01) .....                                                                 | 33    |
| 7 Erhebung von Kirchgeld im Bereich der Ev. Landeskirche in Württemberg. BFH, Beschluss vom 22.1.2002 (I B 18/01) .....                                                                                   | 39    |
| 8 Steuerliche Berücksichtigungsfähigkeit des häuslichen Arbeitszimmers eines Pfarrgeistlichen. FG München, Urteil vom 22.1.2002 (6 K 3603/01) .....                                                       | 42    |
| 9 Arbeitsvertraglichen Richtlinien des Deutschen Caritasverbandes (AVR) kein Tarifvertrag. BAG, Beschluss vom 23.1.2002 (4 AZN 760/01) .....                                                              | 46    |
| 10 Klageerzwingungsverfahren wegen Volksverhetzung, Antragsbefugnis einer Religionsgemeinschaft. OLG Stuttgart, Beschluss vom 23.1.2002 (1 Ws 9/02) .....                                                 | 48    |
| 11 Zur Frage der Zuerkennung von Schmerzensgeld im Falle einer Bluttransfusion bei einem Zeugen Jehovas gegen dessen ausdrücklich erklärten Willen. OLG München, Urteil vom 31.1.2002 (1 U 4705/98) ..... | 51    |
| 12 Scientology-Werbung in Fußgängerzone. VGH Baden-Württemberg, Urteil vom 31.1.2002 (5 S 3057/99) .....                                                                                                  | 66    |
| 13 Hinweis in der Lohnsteuerkarte auf Nichtzugehörigkeit zu einer Religionsgemeinschaft. FG München, Urteil vom 5.2.2002 (13 K 5064/01) .....                                                             | 88    |

|    |                                                                                                                                                                  |     |
|----|------------------------------------------------------------------------------------------------------------------------------------------------------------------|-----|
| 14 | Mitgliedschaft in israelitischer Kultusgemeinde. FG Köln, Urteil vom 6.2.2002 (11 K 3900/99) .....                                                               | 93  |
| 15 | Außerordentliche Kündigung eines KODA-Mitglieds wegen eines Zeitschriftenartikels. LAG München, Urteil vom 7.2.2002 (4 Sa 218/01) .....                          | 101 |
| 16 | Warnung eines kirchl. Sektenbeauftragten vor gewerblichen Aktivitäten einer anderen Religionsgemeinschaft. OLG München, Urteil vom 8.2.2002 (21 U 3532/01) ..... | 109 |
| 17 | Fortgeltung der AVR-Caritas bei Betriebsübergang. LAG Bremen, Urteil vom 21.2.2002 (3 Sa 17/02) .....                                                            | 121 |
| 18 | Kirchsteuererhebung verfassungskonform. FG München, Urteil vom 25.2.2002 (13 K 341/01) .....                                                                     | 127 |
| 19 | Gebetspausen während der Arbeitszeit. LAG Hamm, Urteil vom 26.2.2002 (5 Sa 1582/01) .....                                                                        | 129 |
| 20 | Aufklärungspflichtverletzung bei selbstschuldnerischer Bürgschaft eines Mönchs. BGH, Urteil vom 28.2.2002 (IX ZR 153/00) .....                                   | 139 |
| 21 | Staatl. Justizgewährungspflicht für Anspruch auf Staatsleistungen einer israelitischen Kultusgemeinde. BVerwG, Urteil vom 28.2.2002 (7 C 7/01) .....             | 140 |
| 22 | Nebentätigkeit eines Krankenpflegers als Bestatter. BAG, Urteil vom 28.2.2002 (6 AZR 357/01) .....                                                               | 146 |
| 23 | Kein Ausschluss des Umgangsrechts wegen Zugehörigkeit zu den Zeugen Jehovas. AG Göttingen, Beschluss vom 28.2.2002 (44 F 156/00 UG) .....                        | 153 |
| 24 | Einschränkung von liturgischem Glockenläuten. BayVGH, Urteil vom 1.3.2002 (22 B 99.338 W) .....                                                                  | 155 |
| 25 | Loyalitätspflicht einer Kindergartenleiterin im kirchlichen Dienst. BVerfG, Beschluss vom 7.3.2002 (1 BvR 1962/01) .....                                         | 164 |
| 26 | Gerichtszuständigkeit im Streit über die religiöse Erziehung der Kinder. AG Weilburg, Beschluss vom 8.3.2002 (22 F 1642/01) .....                                | 167 |
| 27 | Vergütung für Dipl.-Theologen als Berufsbetreuer. OLG Thüringen, Beschluss vom 11.3.2002 (6 W 54/02) .....                                                       | 171 |
| 28 | Kopftuchverbot für muslimische Lehrerin im öffentl. Schuldienst. OVG Lüneburg, Urteil vom 13.3.2002 (2 LB 2171/01) .....                                         | 173 |

|    |                                                                                                                                                     |     |
|----|-----------------------------------------------------------------------------------------------------------------------------------------------------|-----|
| 29 | Ermäßigter Umsatzsteuersatz für die Gestaltung von Kirchenfenstern u. sakralen Gegenständen. FG Münster, Urteil vom 14.3.2002 (5 K 7990/99 U) ..... | 189 |
| 30 | Keine Sorgerechtsänderung wegen Beitritts zu den Zeugen Jehovas. OLG Karlsruhe, Beschluss vom 15.3.2002 (2 [20] UF 106/01) .....                    | 196 |
| 31 | BAT-KF / AVR und Betriebsübergang. BAG, Urteil vom 20.3.2002 (4 AZR 101/01) .....                                                                   | 203 |
| 32 | Berücksichtigung des Kirchensteuer-Hebesatzes bei der Bemessung von Arbeitslosenhilfe. BSG, Urteil vom 21.3.2002 (B 7 AL 18/01 R) ..                | 211 |
| 33 | Bürgerbegehren gegen bauplanungsrechtliche Zulässigkeit einer Moschee mit Minarett. VG Augsburg, Urteil vom 21.3.2002 (Au 8 K 01.14089) .....       | 106 |
| 34 | Parteiausschluss wegen Scientology-Mitgliedschaft. BVerfG, Beschluss vom 28.3.2002 (2 BvR 307/01) .....                                             | 220 |
| 35 | Vollstreckung aus kirchengerichtlichem Kostenfestsetzungsbeschluss. OVG Nordrhein-Westfalen, Beschluss vom 28.3.2002 (5 E 286/01) ...               | 225 |
| 36 | Sonderunterhalt für Kosten der Kommunionfeier. OLG Köln, Beschluss vom 5.4.2002 (27 WF 61/02) .....                                                 | 228 |
| 37 | Wohnraumförderung für Krankenpflegekräfte, Widerruf. BayVGH, Urteil vom 9.4.2002 (24 B 00.2744) .....                                               | 229 |
| 38 | Zwangsräumung einer besetzten Kirche. EGMR, Urteil (judgment) vom 9.4.2002 (Appl.No. 51346/99 [Cisse ./ Frankreich]) .....                          | 237 |
| 39 | Beteiligungsrecht der MAV u. Genehmigungsvorbehalt bei Kündigung. BAG, Urteil vom 12.4.2002 (2 AZR 148/01) .....                                    | 247 |
| 40 | Rechtsweg für Klage auf Dienstbezüge eines ev. Pfarrers. VG Düsseldorf, Urteil vom 19.4.2002 (1 K 8559/99) .....                                    | 252 |
| 41 | Kirchenaufsichtliche Genehmigung für Grundstücksgeschäfte des Bischöflichen Stuhls. LG Schwerin, Beschluss vom 22.4.2002 (5 T 152/02) .....         | 264 |
| 42 | Beihilfe zur Selbsttötung (assisted suicide). EGMR, Urteil (judgment) vom 29.4.2002 (Appl.No. 2346/02 [Pretty ./ Vereinigtes Königreich]) .....     | 265 |
| 43 | Steuerliche Behandlung von Geschäftsbeziehungen mit Scientology. FG München, Urteil vom 7.5.2002 (12 K 5320/99) .....                               | 273 |

|    |                                                                                                                                                                                    |     |
|----|------------------------------------------------------------------------------------------------------------------------------------------------------------------------------------|-----|
| 44 | Religionsgesetzliche Pflicht zur Beachtung von Bekleidungs-<br>vorschriften kein Asylgrund. OVG Rheinland-Pfalz, Urteil vom 17.5.2002<br>(6 A 10217/02) .....                      | 279 |
| 45 | Absoluter und relativer Tendenzschutz bei Betrieben von Weltan-<br>schauungsgemeinschaften. LAG Hamm, Beschluss vom 17.5.2002 (10<br>TaBV 140/01) .....                            | 282 |
| 46 | Streit der Eltern über den Termin der Taufe. AG Lübeck, Beschluss<br>vom 23.5.2002 (129 F 116/02) .....                                                                            | 296 |
| 47 | Einreiseverweigerung für Oberhaupt einer Religionsgemeinschaft.<br>OVG Rheinland-Pfalz, Urteil vom 7.6.2002 (12 A 10349/99) .....                                                  | 299 |
| 48 | Befreiung von Baugebühr für kirchliche Stiftung. Niedersächsisches<br>OVG, Beschluss vom 12.6.2002 (1 LA 1134/01) .....                                                            | 304 |
| 49 | Begrenzung des Abzugs von Kirchenbeiträgen als Sonderausgaben.<br>BFH, Urteil vom 12.6.2002 (XI R 96/97) .....                                                                     | 307 |
| 50 | Kein Anspruch auf Heimunterricht für schulpflichtige Kinder aus<br>religiösen oder weltanschaulichen Gründen. VGH Baden-Württem-<br>berg, Urteil vom 18.6.2002 (9 S 2441/01) ..... | 310 |
| 51 | Schutz der Bezeichnung „Franziskaner“. OLG Frankfurt am Main,<br>Urteil vom 20.6.2002 (6 U 62/01) .....                                                                            | 326 |
| 52 | Zuverlässigkeit für private Arbeitsvermittlung, Verfahrensmängel.<br>BSG, Beschluss vom 25.6.2002 (B 11 AL 21/02 B) .....                                                          | 329 |
| 53 | Staatl. Warnung vor sog. Jugendsekten. BVerfG, Beschluss vom<br>26.6.2002 (1 BvR 670/91) .....                                                                                     | 336 |
| 54 | Erlass von Kirchensteuer für länger zurückliegende Veranlagungs-<br>zeiträume. BFH, Beschluss vom 26.6.2002 (I B 10/01) .....                                                      | 359 |
